1

## 2 **Title**

3 Inflation versus filling-in: why we feel we see more than we actually do in  
4 peripheral vision

5

## 6 **Authors & Affiliations:**

7 Brian Odegaard<sup>1</sup>

8 Min Yu Chang<sup>2,3</sup>

9 Hakwan Lau<sup>1,2,4</sup>

10 Sing-Hang Cheung<sup>2</sup>

11

12 <sup>1</sup>Department of Psychology, University of California, Los Angeles

13 <sup>2</sup>Department of Psychology, University of Hong Kong

14 <sup>3</sup>College of Human Ecology, Cornell University

15 <sup>4</sup>Brain Research Institute, University of California, Los Angeles

---

16 \*Authors for correspondence:

17 (1) Brian Odegaard, [odegaard.brian@gmail.com](mailto:odegaard.brian@gmail.com)

18 (2) Sing-Hang Cheung, [singhang@hku.hk](mailto:singhang@hku.hk)

19 †Present address:

20 (1) Franz Hall, 502 Portola Plaza, Los Angeles, CA 90095

21 (2) 6th Floor, Jockey Club Tower, The University of Hong Kong, Hong Kong

22

## 23 **Keywords**

24

25 Peripheral Vision, Crowding, Summary Statistics, Inflation, Signal Detection Theory

## 26 **Abstract**

27

28 Do we perceive fine details in the visual periphery? Here, we propose that  
29 phenomenology in the visual periphery can be characterized by an *inflated* sense of  
30 perceptual capacity, as observers overestimate the quality of their perceptual inputs.  
31 Distinct from the well-known perceptual phenomenon of “filling-in” where perceptual content  
32 is generated or completed endogenously, inflation can be characterized by incorrect  
33 introspection at the subjective level. The perceptual content itself may be absent or weak  
34 (i.e., not necessarily filled-in), and yet such content is mistakenly regarded by the system as  
35 rich. Behaviorally, this can be reflected by *metacognitive* deficits in the degree to which  
36 confidence judgments track task accuracy, and *decisional* biases for observers to think  
37 particular items are present, even when they are not. In two experiments using paradigms  
38 which exploit unique attributes of peripheral vision (crowding and summary statistics), we  
39 provide evidence that both types of deficits are present in peripheral vision, as observers’  
40 reports are marked by overconfidence in discrimination judgments and high numbers of false  
41 alarms in detection judgments. We discuss potential mechanisms which may be the cause  
42 of inflation and propose future experiments to further explore this unique sensory  
43 phenomenon.

44

45

## 46 Introduction

47

48 How much of the visual periphery do we actually see? Some findings indicate that  
49 we perceive the periphery in precise detail [1] and that limitations in our ability to recall items  
50 are based mainly on memory, rather than sensory, processing constraints [2,3] But findings  
51 such as inattention blindness [4] and change blindness [5,6] indicate that perception of  
52 items presented outside the fovea is quite limited. Thus, a question arises as to whether our  
53 subjective sense of the visual periphery is *inflated* beyond what we should expect based on  
54 the underlying processing limitations.

55

56 Research on two visual phenomena present unique opportunities to explain the  
57 puzzle of peripheral phenomenology: crowding and summary computations. Crowding is  
58 defined by deficits in the ability to identify objects surrounded by “clutter” in the visual  
59 surround [7]. For example, identifying the middle letter in a row of three letters is relatively  
60 easy when they are presented in the center of the visual field, but surprisingly difficult when  
61 they are shown in the periphery. Results reveal that crowding can change appearance [8,9],  
62 and therefore may be at least partially responsible for impairments in identifying objects in  
63 the periphery. Crowding can even result in metacognitive errors [10], indicating that it affects  
64 not only perceptual performance, but likely subjective phenomenology as well.

65

66 Summary statistics are defined by the visual system’s tendency to represent fine  
67 details in the visual periphery as an ensemble, as individual components are compressed  
68 into a gist-based representation [11]. This capacity for summary representation extends  
69 across a wide variety of dimensions, as observers can estimate average size [12], motion  
70 direction [13], position [14], and orientation [15] of groups of elements quite effectively. It has  
71 been posited that summary statistics may underlie phenomenological experience of the  
72 visual periphery [16]. This view finds support in work using metamers [17], which shows that  
73 pooling mechanisms outside the fovea can cause distinct images to be perceptually  
74 indistinguishable. This demonstrates how distortions of peripheral visual content may not  
75 always result in subjective perceptual differences. And yet, introspectively, we don’t seem to  
76 think we would fail to notice such distortions.

77

78 How can we characterize this mismatch between introspective phenomenology and  
79 actual perceptual representational quality in peripheral vision, to go beyond anecdotal  
80 descriptions? Traditionally, the mechanism of “filling-in” is thought to be important and  
81 relevant. Filling-in is a perceptual phenomenon whereby features from surrounding regions  
82 of the visual field are perceived despite their physical absence in a particular location [18].  
83 Typically, this is thought to be achieved by having the perceptual content in early sensory  
84 systems (e.g., V1) generated endogenously [19]. That is, actual content is created in the  
85 absence of external input. This can lead to illusory perception of color [20], texture [21],  
86 motion [22], brightness [23], and other visual attributes. Filling-in is most evident in the blind  
87 spot, where the visual system compensates by representing similar content in this region  
88 without inputs [24], but is also evident in perceptual illusions like neon color spreading [25]  
89 and the Troxler effect [26]. Evidence indicates that the neural mechanisms underlying filling-  
90 in reside in early-level visual areas [18,27–29], as early sensory representations are  
91 completed based on top-down rather than bottom-up input.

92

93 However, over and above the degree to which filling-in may play a role across the  
94 visual field, we hypothesize that a second process, *inflation*, also plays a role in perception  
95 of the visual surround. Inflation can be defined as the subjective overestimation of the  
96 reliability or quality of the sensory representations themselves. That is, the representations  
97 themselves are not necessarily filled-in with details, but are subjectively misestimated to be

98 rich in content. Across the entire visual periphery, it is unlikely filling-in processes provide all  
99 the fine details in early sensory regions in a precise, pixelated representation instantly, as  
100 soon as we view a scene. In addition, there is evidence that even in cases where filling-in  
101 occurred, such as in the blind spot, there are additional subjective biases to be accounted for  
102 [30].

103 To assess inflation in experiments, there are two aspects of behavior that can be  
104 investigated: one may show a *metacognitive* bias to be overly confident in perceptual  
105 judgments [31] given current processing limitations, and/or a *decisional* bias to think things  
106 are present, even when they are not [32]. Because these biases can be captured with signal  
107 detection theoretical (SDT) measures, they can be readily characterized in quantitative terms  
108 in psychophysical experiments. Importantly, just because these biases are in terms of  
109 decision or confidence criteria does not mean they only reflect shifts in response strategy; it  
110 has been argued that these biases can reflect subjective perceptual phenomenology, which  
111 we interpret is likely the case here as well [33,34]. In part, this argument is due to the  
112 observation that feedback and training did not seem to remove such biases [31]; if they were  
113 at the cognitive or response level, we would expect them to be more flexible and adaptive.  
114

115 Previous work has already provided support for this inflation account for stimuli  
116 perceived under lack of attention. For example, according to [31], under conditions of  
117 inattention, representational precision of visual information is reduced, but a similar criterion  
118 is used compared to attended conditions, resulting in higher numbers of false alarms when  
119 making detection judgments [32], and higher ratings of visibility when making discrimination  
120 judgments [31]. Inflation can be interpreted to follow similar principles. In the visual  
121 periphery, processing capacity is reduced [35,36]. Similar to what has been shown under  
122 inattention, this may lead to an overestimated sense of how visible the periphery is, despite  
123 deficits in processing.  
124

125 Here, to investigate the role that inflation may play in the periphery, we combined the  
126 study of crowding and summary statistics with SDT to quantitatively characterize whether  
127 inflation occurs in each of these scenarios. Specifically, we will show how the methods of  
128 assessing metacognitive bias (in a discrimination task) and detection biases may be useful  
129 in different contexts. In our crowding study, we assessed whether metacognition in a  
130 discrimination task is impaired in the periphery. This is because crowding typically impairs  
131 discrimination but not detection itself [37]. We aimed to evaluate confidence judgments in  
132 crowded conditions to investigate how effectively confidence tracks performance on a trial-  
133 by-trial basis. On the other hand, in our summary statistical study, we evaluated whether  
134 there may be detection biases when subjects had to detect line patches with a coherent  
135 orientation pattern. One advantage of detection tasks is that we can look at the false alarm  
136 trials, where the physical stimuli are matched between the central and the peripheral  
137 locations. To compare performance between center and periphery, one often ends up using  
138 stronger stimuli for the periphery, for otherwise sensitivity may be too low compared to  
139 central vision. In focusing only on false alarms, we bypass this issue of stimulus confound.  
140

140

## 141 **Experiment 1: Metacognition in Crowding**

142

143 In our first experiment, we explored how crowding, an omnipresent phenomenon in  
144 the visual periphery in everyday settings, may be linked to inflation. Specifically, we were  
145 interested in whether trial-by-trial confidence ratings would effectively track task  
146 performance, or whether these ratings would reveal impaired metacognition for elements in  
147 the visual surround (see Figure 1).

## 148 **Methods**

149

### 150 *Participants*

151

152 Thirty young adults (18-30 years old,  $M = 22.00$ ,  $SD = 2.95$ ; 25 females) with normal  
153 or corrected-to-normal vision were recruited from the University of Hong Kong to participate  
154 in this experiment. All participants volunteered and received no monetary compensation for  
155 their time spent in the experiment. This experiment was part of the second author's  
156 undergraduate thesis study and was approved by the Departmental Research Ethics  
157 Committee in the Department of Psychology at the University of Hong Kong. Informed  
158 consent was obtained from all participants before the experiment began. Twenty-three  
159 participants successfully completed this task. Among the seven participants that were  
160 excluded, five were excluded due to very low threshold differences between the crowded  
161 and single conditions, which indicates absence of crowding (possibly due to unstable  
162 fixations), and two were excluded due to not following the instructions (one exhibited near-  
163 chance accuracy [ $< 60\%$ ] and one exhibited a negative meta-d' score).

164

### 165 *Apparatus and Materials*

166

167 Participants attended the experimental session in the Department of Psychology at  
168 the University of Hong Kong. The experiment was coded in MATLAB using the  
169 Psychophysics Toolbox [38–40] and custom-written code for stimulus presentation. Stimuli  
170 were presented on a 17-inch CRT monitor (1024 × 768 pixel resolution at 85Hz refresh rate).  
171 Background luminance was 17.8 cd/m<sup>2</sup> with ambient light turned off. A headrest and a  
172 chinrest were used to help the participants maintain a viewing distance of 92cm.

173

174 Both target and flankers were sine wave gratings (2 cpd) presented through a circular  
175 window of 2.5° in diameter. Orientation of the gratings was either 45° clockwise or 45°  
176 counterclockwise; both orientations had an equal probability of being displayed on a given  
177 trial. The target was presented 10° above the fixation cross, which subtended 0.3° and was  
178 presented near the bottom of the display. Two flanker gratings were presented left and right  
179 of the target at a target-flanker distance (center-to-center) of 3° in the crowded condition.  
180 This combination of target eccentricity and target-flanker distance was based on previous  
181 paradigms which showed robust crowding [41,42].

182

### 183 *Procedure*

184

185 After signing the informed consent form, participants were introduced to the task  
186 (Figure 1). Participants performed an orientation discrimination task in each trial. Each trial  
187 started with the participants fixating on the fixation cross. Participants pressed (Space) to  
188 initiate stimulus presentation. Either the target alone (single condition) or the target with two  
189 flankers (crowded condition) were then presented for 35ms. After the stimulus screen, two  
190 vertical lines tilted clockwise and counterclockwise were presented to the right and left of the  
191 fixation cross, respectively, to prompt the participants to respond using the number pad.  
192 Participants pressed (4) for left or (6) for right, and no feedback was given. After the  
193 orientation judgment, participants also reported their confidence in their judgment using a  
194 scale from 1 (not at all confident) to 3 (extremely confident). Participants pressed (4) for 1,  
195 (5) for 2 and (6) for 3 in rating their confidence. We did not monitor eye movements in this  
196 experiment. However, the exposure duration we used was too short to execute a saccade  
197 from the fixation cross to the target.

198

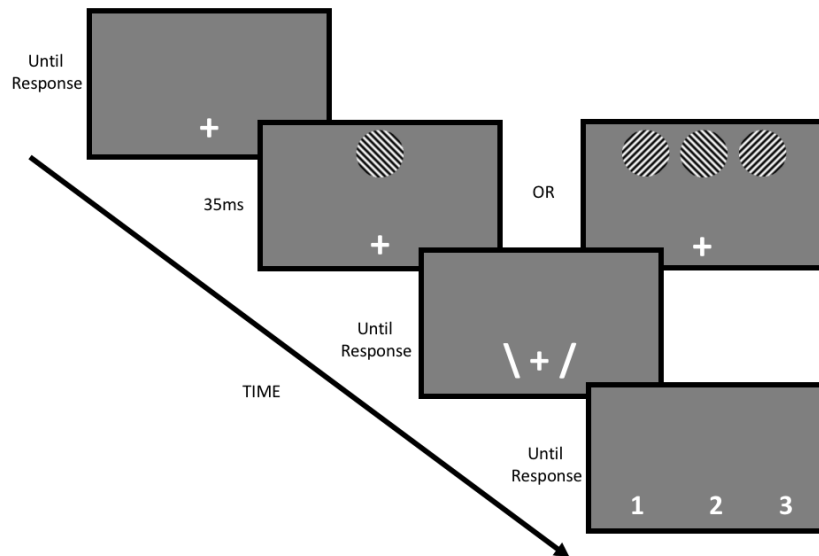

199

200

201

202

203

204

205

206

207

208

209

210

211

212

213

214

215

216

217

218

219

220

221

222

223

224

225

226

227

228

229

230

231

232

233

234

235

**Figure 1. Protocol for each trial in Experiment 1.** The fixation cross was shown throughout the trial. After participants pressed the ‘space bar’ on the keyboard to initial the trial, the target sine wave gratings were presented above the fixation cross. This target grating could either be presented alone (single condition), or surrounded by other gratings on each side (crowded condition), and all patches were presented for 35ms. Participants then had to report the orientation of the target patch (left or right) and also rate their confidence for their report on a scale of 1-3. We note that the sine wave gratings displayed in this figure are not to scale; we increased their size to improve appearance, but see Methods for details about size.

Each trial block consisted of 64 single and 64 crowded trials. We used separate fixed-step-size staircases to continuously adjust the Michelson contrast levels for the two types of trials. A one-up one-down staircase with a down-step size to up-step size ratio of .2845 was chosen to achieve a target accuracy level of 77.85% [43]. There were two blocks of practice trials, followed by eight blocks of experimental trials. Participants performed only the orientation discrimination task during the first practice block. Initial contrast levels were set at .4 and .8 for the single and crowded trials respectively in the first block. Staircases in blocks two to ten started with final contrast levels from the previous block. The signal detection theoretic measures  $d'$  and meta- $d'$  [44] were calculated based on blocks three to ten. If the staircases worked as planned,  $d'$  should be matched between the single and crowded conditions. However, our current setup failed to render the required contrast levels (i.e., contrast was not low enough for the single condition or required contrast going beyond 1 for the crowded condition) for some participants. Therefore, we observed a statistically significant difference in  $d'$  between the single and the crowded conditions.

### Analysis

Each participant’s data were analyzed using custom software for Signal Detection Theory (SDT) analysis [44–46]. Specifically, we used the `fit_meta_d_MLE.m` file to estimate both Type 1 ( $d'$ ) and Type 2 (meta- $d'$ ) SDT parameters for sensitivity.

### Results

As shown in Figure 2, participants displayed better performance (measure by the signal detection theoretic measure  $d'$ ) in the single condition compared to the crowded condition,  $t(22) = 7.35$ ,  $p < 10^{-6}$ . Interestingly, participants displayed relative metacognitive

236 impairments in the crowded condition compared to the single condition. We used the M-ratio  
237 to quantify metacognitive efficiency. The M-ratio, which is the fraction  $\text{meta-}d'/d'$ , represents  
238 the amount of signal strength available for metacognition, and reflects the metacognitive  
239 efficiency in a given subject [44,46–48]. An M-ratio near 1 represents metacognitively ideal  
240 performance. As can be seen in Figure 2, on average, participants were close to  
241 metacognitively optimal in the single condition; the small exceedance above 1 can be  
242 ascribed to estimation error or that they did not perform the primary discrimination task  
243 perfectly according to SDT. However, in the crowded condition, participants displayed clear  
244 metacognitive deficits, as the M-ratio was significantly lower in this condition compared to  
245 the single condition,  $t(22) = 4.26$ ,  $p < 10^{-3}$ . Thus, when experiencing crowding effects in the  
246 visual periphery, subjective assessments of how we see deviate from optimality. One could  
247 argue this may be due to the fact that in the crowded conditions,  $d'$  itself was lower, and the  
248 M-ratio method may not have removed the influence of this difference perfectly, but the next  
249 result addresses this concern.  
250

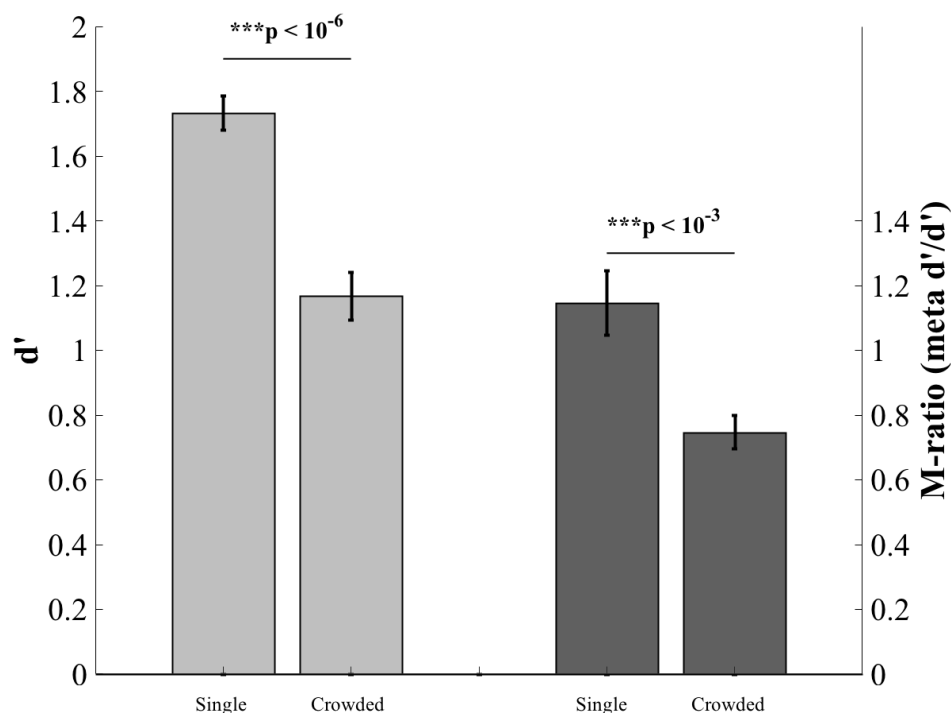

251

252 **Figure 2. Perceptual sensitivity and metacognitive efficiency in an orientation**  
253 **discrimination task.** Shown here are the results from 23 participants in Experiment 1. As  
254 shown by the light gray bars, participants were much less effective at discriminating the  
255 orientation of a tilted grating compared when it was surrounded by other gratings, compared  
256 to discriminating the orientation of a single grating.  $d'$  is the standard detection-theoretic  
257 measure of sensitivity. Shown by the dark gray bars is a measure of the metacognitive  
258 efficiency (the M-ratio;  $\text{meta-}d' / d'$ ) in both conditions, which indicates how effectively  
259 confidence ratings could distinguish between correct and incorrect judgments. As can be  
260 seen in the figure, metacognitive efficiency was impaired in the crowded condition compared  
261 to the single condition.  
262  
263

264 To better illustrate the basis of this phenomenon, we also analyzed average  
265 confidence in the single and crowded conditions, separating trials by whether they were  
266 correct or incorrect (Fig. 3). As can be seen in this figure, on *correct* trials, confidence was  
267 approximately the same between the single and crowded conditions,  $t(22) = -0.25$ ,  $p = 0.81$ .  
268 However, on *incorrect* trials, confidence was higher for the crowded trials compared to the

269 single trials,  $t(22) = -8.46$ ,  $p < 10^{-7}$ . Notably, this higher confidence was shown despite the  
270 fact that people were overall less accurate in the crowded condition. Therefore, the deficit in  
271 metacognition in crowding seems to be primarily driven by overconfidence on incorrect trials:  
272 when participants are wrong about what they see in the periphery, they don't always know it,  
273 and have more confidence in their perceptions than what is warranted.  
274

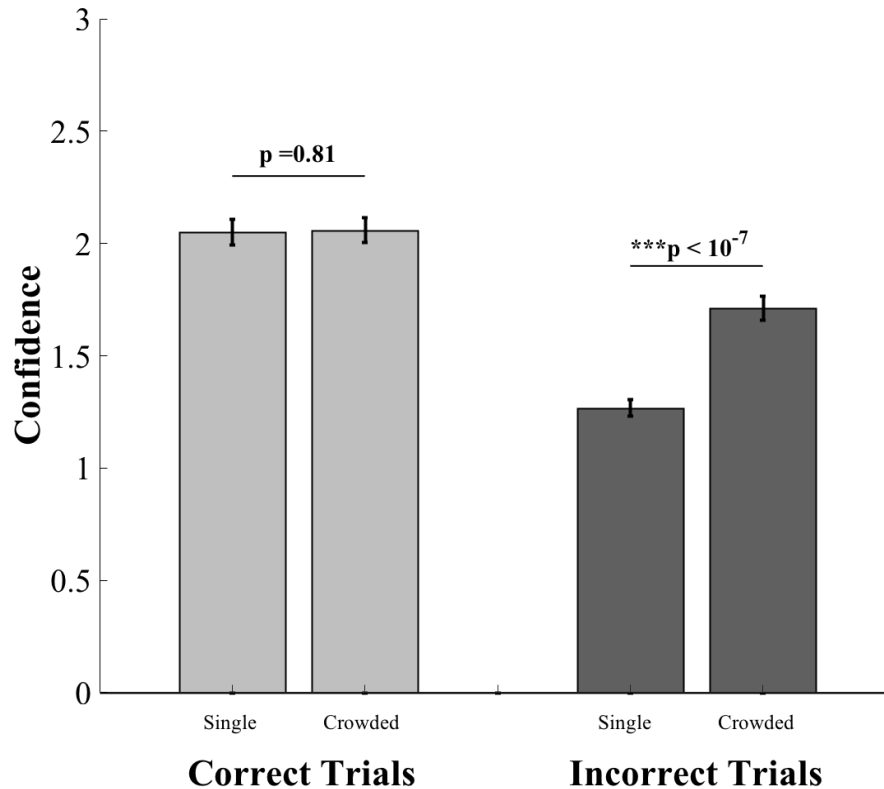

275 **Figure 3. Average confidence for correct and incorrect trials.** The light gray bars  
276 indicate the average confidence for correct trials for the single and crowded conditions. As  
277 can be seen in the figure, the difference between these conditions is not significant. The  
278 dark gray bars indicate the average confidence for incorrect trials. A clear difference  
279 between the single and crowded conditions is evident, and participants are significantly more  
280 confident in the incorrect crowded trials compared to the incorrect single trials.  
281  
282

## 283 Experiment 2: Detection based on summary statistics

284  
285 It has been proposed that part of what characterizes phenomenological experience of  
286 the visual periphery is the visual system's capacity to represent groups of items as  
287 ensembles or gist-based representations [16]. In other words, rather than encoding details  
288 in the periphery with high fidelity, visual information is compressed to eliminate redundancy  
289 and represent information outside the fovea in the form of summary statistics [11].  
290 Considering the results from Experiment 1, it is an intriguing question how summary  
291 statistical judgment may be biased by the fact that individual crowded items may  
292 nonetheless provide a subjectively reliable percept, so that all the items together may  
293 subjectively look as if they are more coherent than they really are.  
294

295 In Experiment 2, we investigated whether such detection biases exist in the  
296 periphery. On each trial, we presented observers with a diamond-shaped stimulus  
297 composed of many individual lines with various orientations (Fig. 4). We hypothesized that,  
298 similar to previous investigations, observers would be much more likely to say that a

299 congruent patch of lines was *present*, even when the lines were composed of only random  
300 orientations.

## 301 **Methods**

302

### 303 *Participants*

304

305         Seventy-four total research participants responded to an advertisement on Amazon's  
306 mTurk online platform and successfully completed the experimental task. Three participants  
307 were excluded due to errors in the fitting procedure from the MATLAB files for estimating  
308 signal detection parameters [45]. No personal or demographic information about  
309 participants was collected, with the exception of using each participant's unique Amazon  
310 mTurk ID to process payments. Research participants were informed before the study that it  
311 would require approximately one hour to complete, and that they would earn \$4 upon  
312 finishing the task, with the possibility of earning an additional \$1 bonus if their performance  
313 on the task was better than the previous participant. Participants were notified that they  
314 could drop out of the experiment at any time, and were informed that they would be paid at a  
315 prorated amount of \$1 per 15 minutes for the amount of time they participated in the study.

316

### 317 *Apparatus and Materials*

318

319         We required all participants to use Google Chrome as their web browser for the  
320 experiment by adding code which excluded other browsers from running the task.  
321 Participants were informed of this requirement before beginning the experiment. The  
322 experiment was coded in JavaScript using plugins from the jsPsych library [49] and custom-  
323 written code for stimulus presentation. The psiTurk platform [50] was used to launch the  
324 study, administer subject payments, and control various elements of the task presentation  
325 and design (e.g., the hours when the task could be completed, the maximum time allowed to  
326 complete the task, enforce U.S. IP addresses for participants, and other details).

327

### 328 *Procedure*

329

330         Following acceptance of our online "HIT" (Human Intelligence Task) advertisement  
331 on Amazon's mTurk website, participants were presented with a consent form for the  
332 experiment, which was approved by the UCLA Institutional Review Board (#15-001484).  
333 Once participants agreed to the terms in the consent form, a new browser window was  
334 opened and participants began the main experiment. First, instruction screens were  
335 presented to request that participants be seated approximately one arm's length away from  
336 their computer screen, and to be positioned directly in front of the screen. Next, participants  
337 were informed of the experimental task.

338

339         Participants were instructed that they would be required to make judgments about a  
340 diamond-shaped pattern of twenty-five black lines drawn on a white background. Each line  
341 was 4 pixels wide and 30 pixels high, and spacing between each line was 37.5 pixels on  
342 average, with a small amount of random jitter added to each position. Participants were  
343 asked to judge whether there was a group of lines that were all tilted in the same direction,  
344 or whether the lines were drawn only with random orientations. On trials where a group of  
345 lines with congruent rotations were shown, lines with random orientations were resampled if  
the randomly-selected orientation was within 10 degrees of the congruent orientation



346 direction. Participants were informed that the group of lines with a common orientation could  
347 be any number of lines, and that the lines did not have to be next to one another to be  
348 considered part of the group.

349 The experiment began with practice trials to familiarize participants with the stimuli  
350 and task. To begin, three easy practice trials were presented where participants were  
351 shown the line stimulus for 2000ms and then asked to indicate whether a group of lines were  
352 all tilted in the same direction. Participants pressed (Q) for Yes, and (P) for no, and were  
353 given feedback about whether the response was correct.

354 These three trials were followed by two “practice” blocks of 60 trials each, where  
355 staircase procedures with fixed step sizes were implemented. The goal was to establish  
356 how many lines with coherent orientations should be presented for easy, medium, and hard  
357 levels of difficulty, with these three levels designed to approximate ceiling-level performance,  
358 ~85% correct, and ~71-77% correct, respectively [43,51,52]. In the first practice block, a  
359 two-up one-down staircase procedure [51] was implemented to estimate the “hard” level of  
360 difficulty. Each trial began with a fixation cross presented at the center of the screen for  
361 1000ms. Following a 100ms blank screen, one group of lines was flashed at the location of  
362 the fixation cross for 150ms. 800ms later, another group of lines was flashed for 150ms at  
363 the same location. Participants were informed in advance that only one of the two sets of  
364 lines contained a group tilted in the same direction, and had to indicate whether the first or  
365 second presentation contained the coherent group by pressing (Q) or (P) to indicate the first  
366 or second presentation, respectively. Participants were also informed that these practice  
367 blocks counted towards whether they earned the bonus, to increase incentive to put forth  
368 effort as the staircase was implemented. In the second practice block, a four-up one-down  
369 staircase procedure was implemented to establish stimuli that could be used for the  
370 “medium” level of difficulty, and the same protocol as the hard staircase was used for each  
371 trial. For the “easy” level of difficulty, 20 coherent lines were presented, and no staircase  
372 was used to estimate this level. Conditions were included so that the number of coherent  
373 lines in the “hard” condition could not exceed 16, and the number of coherent lines in the  
374 “medium” difficulty condition could not exceed 18.

375 Following the staircase estimations, the real experiment began (Fig. 4). In all trials,  
376 first, the fixation cross was presented at the center of the screen for 1000ms. Following a  
377 100ms blank, a single group of lines was presented for 150ms at either the center of the  
378 screen, or in a peripheral location along the same horizontal meridian, 360 pixels away. To  
379 discourage participants from starting with their eyes anywhere other than the fixation cross,  
380 50% of trials presented the lines at the center, 25% of trials presented the patch of lines in a  
381 peripheral location on the left, and 25% of trials presented the lines in a peripheral location  
382 on the right. After the lines disappeared, participants were required to indicate whether or  
383 not there was a group all tilted in the same direction (by pressing Q or P, respectively), and  
384 following this, were also required to rate how confident they were in their responses, on a  
385 scale from 1 (not at all confident) to 4 (extremely confident).

386

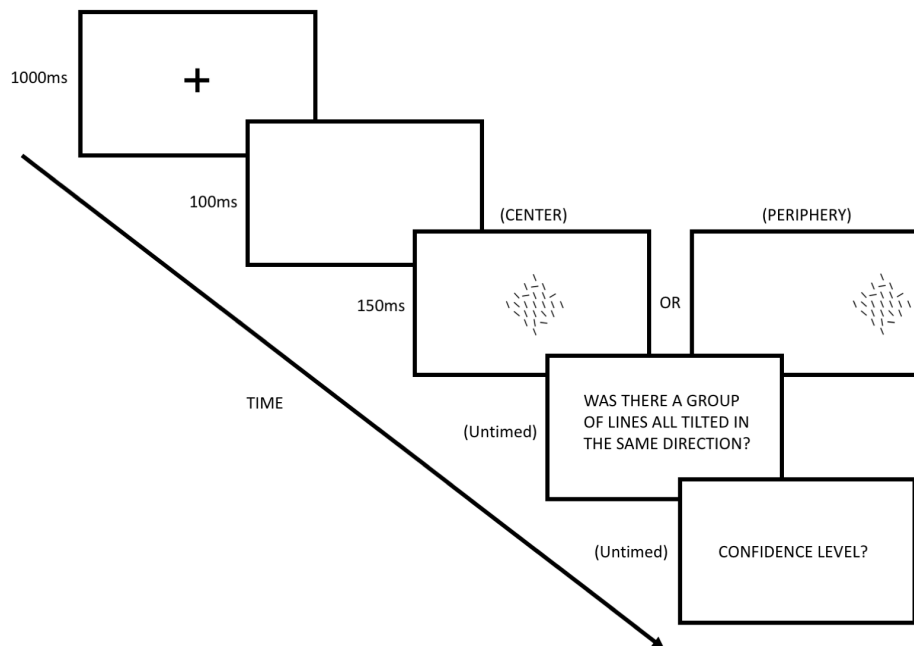

387  
388 **Figure 4. The protocol for each trial in Experiment 2.** Each trial began with a fixation  
389 cross for 1000ms, followed by a 100ms blank screen. Then, lines were presented at either a  
390 central or peripheral location for 150ms. Following presentation of the lines, participants  
391 responded whether a group of coherent lines with the same orientation was present, and  
392 gave their confidence on a scale of 1-4. In this example, there are 16 lines with congruent  
393 orientation in the image. Please note that the wording shown in this schematic differs  
394 slightly from the actual wording displayed in the experiment.

395  
396 There were 360 total trials in the main experiment. 180 trials were presented at the  
397 center, and 180 trials were presented in peripheral locations (90 left, 90 right). Within each  
398 condition (center/periphery), 60 trials were of easy difficulty, 60 medium difficulty, and 60  
399 hard. Catch trials were added at four different trial markers in the experiment (40, 120, 200,  
400 and 280). During a catch trial, a letter was displayed at the center of the screen for 1000ms.  
401 After the letter disappeared, participants were asked whether an a, b, c, or d was displayed,  
402 and were required to input a response on the keyboard. Participants were instructed to take  
403 a break for at least 30 seconds after trial 80, 160, 240, and 320.

#### 404 405 *Analysis*

406  
407 Each individual participant's data were analyzed using custom software for Signal  
408 Detection Theory (SDT) analysis [44–46]. We used the SDT\_MLE\_fit.m file to estimate  
409 basic Type 1 SDT parameters for sensitivity ( $d'a$ ) and bias (i.e., the criterion,  $c'a$ ) for the  
410 aggregated data across all three difficulty levels, and a modified version of the  
411 type2\_SDT\_SEE.m to compute the hit rates and false alarm rates. In Experiment 1, we  
412 used the standard SDT measure  $d'$  because in a discrimination task of that nature, it is  
413 unlikely that the equal variance assumption for the two stimulus representations was  
414 violated. However, in detection tasks this tends to be an issue. Thus, we used the measure  
415  $d'a$  to account for potential differences between the variances of the signal and noise  
416 distributions [53,54].

417

## 418 Results

419

420

421

422

423

424

425

426

427

428

429

As shown in Figure 5, participants were more sensitive (i.e., exhibited higher  $d'a$ ) in detecting whether a group of lines with congruent orientations was present in the central part of the screen (at fixation), compared to when lines were presented at peripheral locations ( $t(70) = 7.39, p < 10^{-9}$ ). Participants also used different criteria for evaluating whether a coherent patch of lines was present at the center of the screen or the periphery. Specifically, participants were more liberal in detecting coherence in the periphery compared to the center, as shown in the differences in  $c'a$  ( $t(70) = 3.89, p < .001$ ). This resulted in a higher number of false alarms (responding “yes” when only random lines were presented) in the periphery compared to center.

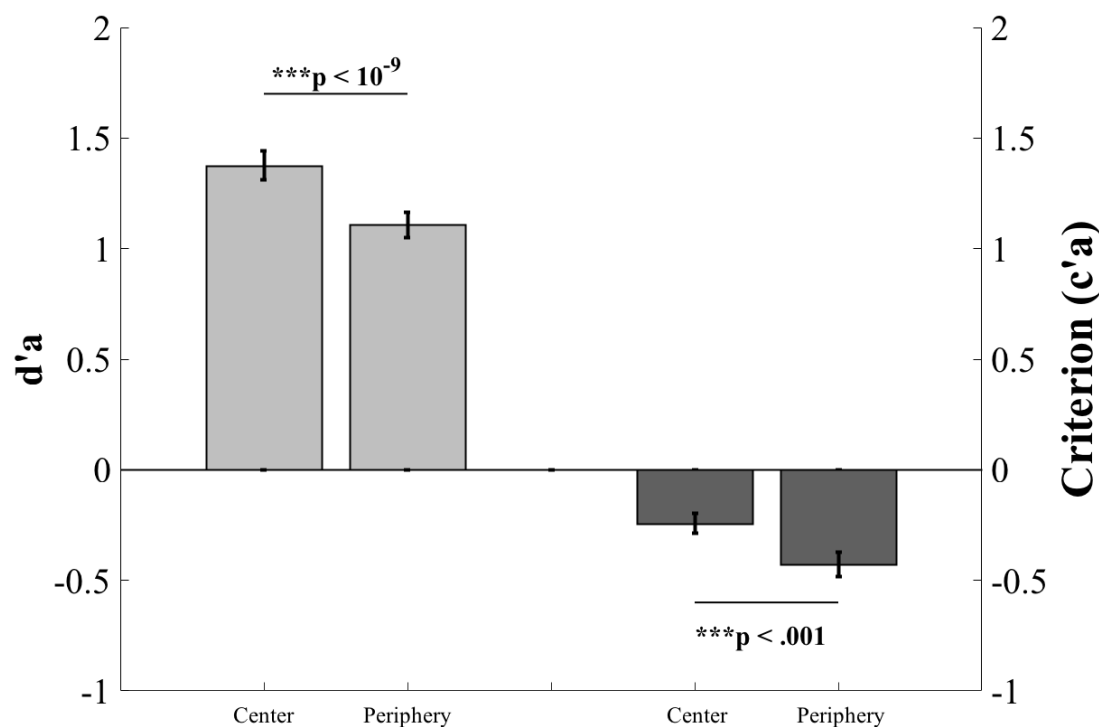

430

431

### 431 **Figure 5. Sensitivity and bias for detecting congruently-oriented groups of lines.**

432

433

434

435

436

437

438

439

440

441

442

Shown here are results from an experiment where participants were asked to detect whether a group of lines with congruent orientations were presented, in either a central or peripheral location. As shown by the light gray panels, using the measure  $d'a$  (which corrects potential unequal variance in detection tasks), participants were more sensitive in detecting the congruent patch of lines at the central location compared to a peripheral location, and yet they used a more liberal criterion  $c'a$  in the periphery for indicating that a patch of lines was present. Notice that although sensitivity was not perfectly matched between center and periphery, usually we expect subjects to be relatively conservative for weaker detection, based on the Neyman-Pearson objective [53,55]. Therefore, the results are striking in that it went opposite to that expectation.

443

444

445

446

447

Specifically, on trials where lines with only *randomly-sampled* orientations were shown and participants incorrectly reported that a congruent patch was presented (i.e., false alarms), results revealed that participants were much more likely to incorrectly respond when the lines were presented in the periphery, compared to trials where the lines were presented in the center (Fig. 6,  $t(70) = -6.80, p < 10^{-8}$ ). No difference across conditions was found in

448 trials where a coherent patch was presented and participants correctly responded ( $t(70) = -$   
449  $0.79$ ,  $p = 0.43$ )

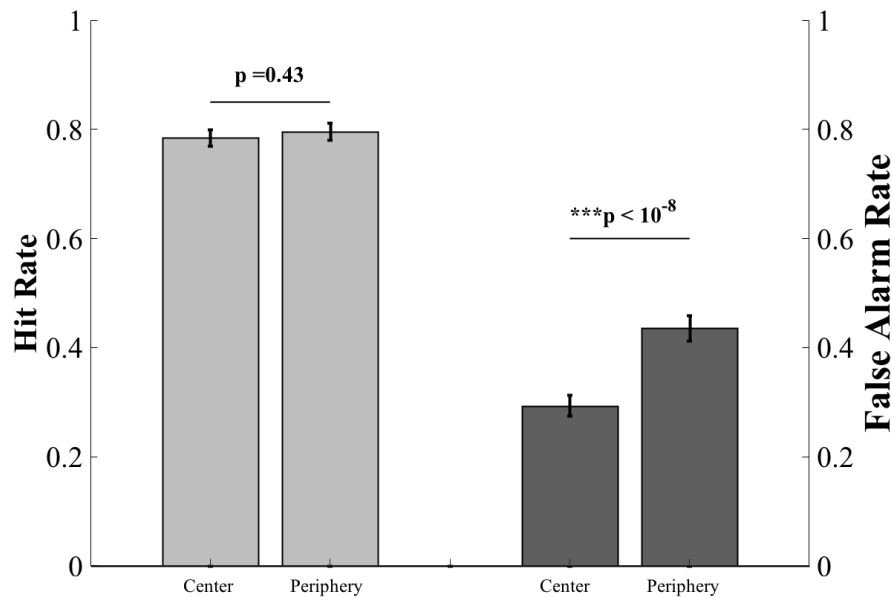

450  
451 **Figure 6. Hit rate and false alarm rate for detecting congruently-oriented groups of**  
452 **lines.** In this figure, the light gray bars along the left axis denote the hit rate (i.e., correctly  
453 responding that a group of lines with similar orientation was presented) and the dark gray  
454 bars along the right axis display the false alarm rate (incorrectly reporting that a group of  
455 lines with similar orientation was shown, when only random lines were presented). While the  
456 hit rate for detection in this task was quite similar across the two conditions, the false alarm  
457 rate was significantly higher in the peripheral condition, compared to the central condition.

458  
459 These results conceptually replicate previous studies showing that observers use  
460 liberal perceptual criteria when making detection-related judgments in the periphery [31,32],  
461 and indicate that this liberal detection criterion is used for not only detecting simple stimuli  
462 like Gabor patches, but also for more complex stimuli involving summary statistics as well.  
463

## 464 Discussion

465  
466 We considered how peripheral visual perception may demonstrate *inflation*, whereby  
467 subjective judgments in this region of space are marked by two behavioral characteristics:  
468 *metacognitive impairments* in how effectively confidence judgments track the correctness of  
469 responses in experimental tasks, and *decisional biases* in observers' tendencies to assume  
470 stimuli are more likely to be presented in the periphery than what actually occurs. We  
471 conducted two experiments to investigate whether these deficits would emerge in tasks  
472 which exploit two well-established phenomena in the visual surround: crowding and  
473 summary statistics. In our first experiment using crowded stimuli, observers showed relative  
474 deficits in metacognitive measures (e.g., the "M-ratio") [46,47] for crowded compared to  
475 single stimuli. This metacognitive deficit was primarily driven by overconfidence in incorrect  
476 responses, which is striking given that subjects did not perform the primary discrimination  
477 task very well under crowding; the overconfidence is highly unwarranted. In our second  
478 experiment using a summary statistical stimulus (groups of oriented lines), observers  
479 exhibited liberal detection criteria and high numbers of false alarms, showing that decisional  
480 biases extend to more complex stimuli than has been previously shown. Both of these  
481 findings provide experimental evidence that, far from perceiving the visual periphery with a  
482 high degree of fidelity [3,56,57], our subjective sense of the visual surround is inflated.

483  
484  
485  
486  
487  
488  
489  
490  
491  
492  
493  
494  
495  
496  
497  
498  
499  
500  
501

Our findings on inflation go beyond what has been shown previously. Previous research has shown that under sensitivity-matched conditions, inflation occurs under inattention and in the periphery [31,32] for simple stimuli, such as Gabor patches. In the present research, sensitivity was not matched, but the stimuli were optimized to exploit the characteristics of peripheral vision, with multiple inputs incorporated simultaneously. These conditions capture the everyday challenges faced by peripheral vision: a deluge of inputs and inherent processing limitations. Under these conditions, the lower sensitivity in crowded/peripheral conditions is expected to result in more conservative detection criteria and lower confidence, but the results strikingly showed the opposite effects. These results demonstrate the prevalence of inflation: it happens also when we did not contrive to fully compensate for the reduced sensitivity in the periphery (by presenting it with stronger stimuli). Inflation is present in various scenarios, including when more complex stimuli are used to challenge the processing bottleneck in peripheral vision. Because crowding and summary statistical judgments happen often in the periphery in everyday life, if inflation is more easily observed in these paradigms than in typical psychophysical experiments involving single targets, the phenomenon may be more prevalent than previously thought [57].

502  
503  
504  
505  
506  
507  
508  
509  
510  
511  
512

One difference between the present work and previous studies [31,32] is that in our second experiment, our peripheral stimulus incorporated elements of both endogenous and exogenous attention. That is, the peripheral stimulus carried inherent locational uncertainty as it could arise in one of two locations, and this uncertainty likely resulted in not only trial-to-trial differences in the allocation of endogenous attention, but also how exogenous attention may have played a role, too, when the stimulus was presented. That may also explain why the effect of inflation was robust even though sensitivity between center versus periphery was not matched. Future investigations should aim to systematically investigate how exogenous attention and endogenous attention may alter the characteristics of inflation that we observed here.

513  
514  
515  
516  
517  
518  
519  
520  
521  
522  
523

These findings raise an important question: what may be a mechanistic explanation for inflation? Previously, one proposed account based on SDT is the variance reduction model [31]. According to the model, inattention and peripheral presentation do not drastically alter the perceptual criteria used to make judgments; therefore, the increased variance in internal response in these circumstances causes a greater frequency of occurrences that the response crosses a detection or confidence criterion. Although there are caveats as to whether the criteria are really so inflexibly fixed [58], the model has also been directly tested and highly counter-intuitive predictions have been confirmed [59]. Nevertheless, we acknowledge the simplistic nature of this model. Future work is needed to further elucidate a biologically realistic mechanism.

524  
525  
526  
527  
528  
529  
530  
531  
532  
533  
534  
535  
536

One potential concern is that based on the results from our first experiment, one could argue that all we observe is a change in confidence, and that the link between confidence and perceptual phenomenology is tenuous. While we acknowledge that confidence is not synonymous with phenomenology *per se*, there are many cases where confidence provides an effective assessment of phenomenology's presence or absence. For example, in blindsight patients, visual task performance is often spared, but phenomenology is not, and confidence ratings provide an effective means to assess the absence of experience of visual content [60,61]. But we note that even when we ask non-metacognitive questions, as in our second experiment, results indicate that observers think they see more of the periphery than they actually do. It is the joint observation, that peripheral perception leads to both erroneous overconfidence and liberal detection bias, that led us to think these findings may be relevant for subjective phenomenology.

537 Also, we interpret these findings to reflect inflation, but this is not to say we rule out  
538 interpretation based on filling-in as well. Although sensitivity was lower in peripheral  
539 detection as well as crowding, such low sensitivity could be the result of filling-in of illusory  
540 (i.e. non-veridical) content too. Our point here, though, is that over and above potentially  
541 filling-in, inflation is likely at play, and its role in accounting for phenomenology in the  
542 periphery is at least as important [30].  
543

544 Finally, why would this sense of inflation have evolved in the visual system? When  
545 considering the decisional bias that is present, it becomes important to reflect on what cost  
546 functions the visual system may be trying to optimize [62]. A liberal detection bias which  
547 causes higher numbers of false alarms may not be “optimal” according to strict signal  
548 detection theory. But in a dynamic, changing world which requires fast identification of  
549 objects for survival, perhaps a slight overestimation of the presence of objects in the  
550 periphery is optimal in the sense that identification of potential threats or rewards can spur  
551 exploration and action, to avoid predators and find food and mates. These liberal detection  
552 biases may also reflect a larger tendency of perceptual and cognitive systems to make high  
553 numbers of false alarms for not only attributes like presence or absence, but also agency in  
554 situations where none exists [63]. Overall, these considerations may account for why we  
555 subjectively perceive the visual world as relatively uniform despite the poor sensitivity in the  
556 periphery.

## 557 **Additional Information**

### 558 **Ethics**

559  
560 All research in Experiment 1 was approved by the Departmental Research Ethics Committee  
561 in the Department of Psychology at the University of Hong Kong. Experiment 1 was an  
562 undergraduate thesis. All research in Experiment 2 was performed under UCLA IRB #15-  
563 001484 and was conducted in accordance with the Declaration of Helsinki.  
564

### 565 **Data Accessibility**

566  
567 All code and datasets supporting this article have been uploaded as part of the  
568 supplementary materials.  
569

### 570 **Authors' Contributions**

571  
572 M.Y.C. and S.H.C performed the data collection and main analyses for Experiment 1. B.O.  
573 conducted the final statistical analysis and created figures for Experiment 1, and performed  
574 the data collection, main analyses, and figure creation for Experiment 2, under the guidance  
575 of H.L. B.O., M.Y.C., H.L., and S.H.C. wrote the paper.  
576  
577

### 578 **Competing Interests**

579 The authors have no competing interests.  
580

### 581 **Funding**

582  
583 This work was supported by a grant from the Air Force Office of Scientific Research (FA-  
584 9550-15-1-0110) to HL, NIH (NINDS) grant NS088628 to HL, and a grant from the Research  
585 Grants Council, Hong Kong (General Research Fund — Project 17676216) to SHC.

## 586 Figure captions

587 **Figure 1. Protocol for each trial in Experiment 1.** The fixation cross was shown  
588 throughout the trial. After participants pressed the 'space bar' on the keyboard to initial the  
589 trial, the target sine wave gratings were presented above the fixation cross. This target  
590 grating could either be presented alone (single condition), or surrounded by other gratings  
591 on each side (crowded condition), and all patches were presented for 35ms. Participants  
592 then had to report the orientation of the target patch (left or right) and also rate their  
593 confidence for their report on a scale of 1-3. We note that the sine wave gratings displayed  
594 in this figure are not to scale; we increased their size to improve appearance, but see  
595 Methods for details about size.

596  
597 **Figure 2. Perceptual sensitivity and metacognitive efficiency in an orientation**  
598 **discrimination task.** Shown here are the results from 23 participants in Experiment 1. As  
599 shown by the light gray bars, participants were much less effective at discriminating the  
600 orientation of a tilted grating compared when it was surrounded by other gratings, compared  
601 to discriminating the orientation of a single grating.  $d'$  is the standard detection-theoretic  
602 measure of sensitivity. Shown by the dark grey bars is a measure of the metacognitive  
603 efficiency (the M-ratio;  $\text{meta-}d' / d'$ ) in both conditions, which indicates how effectively  
604 confidence ratings could distinguish between correct and incorrect judgments. As can be  
605 seen in the figure, metacognitive efficiency was impaired in the crowded condition compared  
606 to the single condition.

607  
608 **Figure 3. Average confidence for correct and incorrect trials.** The light gray bars  
609 indicate the average confidence for correct trials for the single and crowded conditions. As  
610 can be seen in the figure, the difference between these conditions is not significant. The  
611 dark gray bars indicate the average confidence for incorrect trials. A clear difference  
612 between the single and crowded conditions is evident, and participants are significantly more  
613 confident in the incorrect crowded trials compared to the incorrect single trials.

614  
615 **Figure 4. The protocol for each trial in Experiment 2.** Each trial began with a fixation  
616 cross for 1000ms, followed by a 100ms blank screen. Then, lines were presented at either a  
617 central or peripheral location for 150ms. Following presentation of the lines, participants  
618 responded whether a group of coherent lines with the same orientation was present, and  
619 gave their confidence on a scale of 1-4. In this example, there are 16 lines with congruent  
620 orientation in the image. Please note that the wording shown in this schematic differs  
621 slightly from the actual wording displayed in the experiment.

622  
623 **Figure 5. Sensitivity and bias for detecting congruently-oriented groups of lines.**  
624 Shown here are results from an experiment where participants were asked to detect whether  
625 a group of lines with congruent orientations were presented, in either a central or peripheral  
626 location. As shown by the light gray panels, using the measure  $d'a$  (which corrects potential  
627 unequal variance in detection tasks), participants were more sensitive in detecting the  
628 congruent patch of lines at the central location compared to a peripheral location, and yet  
629 they used a more liberal criterion  $c'a$  in the periphery for indicating that a patch of lines was  
630 present. Notice that although sensitivity not perfectly matched between center and periphery,  
631 usually we expect subjects to be relatively conservative for weaker detection, based on the  
632 Neyman-Pearson objective [53,55]. Therefore, the results are striking in that it went opposite  
633 to that expectation.

634  
635 **Figure 6. Hit rate and false alarm rate for detecting congruently-oriented groups of**  
636 **lines.** In this figure, the light gray bars along the left axis denote the hit rate (i.e., correctly  
637 responding that a group of lines with similar orientation was presented) and the dark gray

638 bars along the right axis display the false alarm rate (incorrectly indicating that a group of  
639 lines with similar orientation was shown, when only random lines were presented). While the  
640 hit rate for detection in this task was quite similar across the two conditions, the false alarm  
641 rate was significantly higher in the peripheral condition, compared to the central condition.

## 642 Figures

643

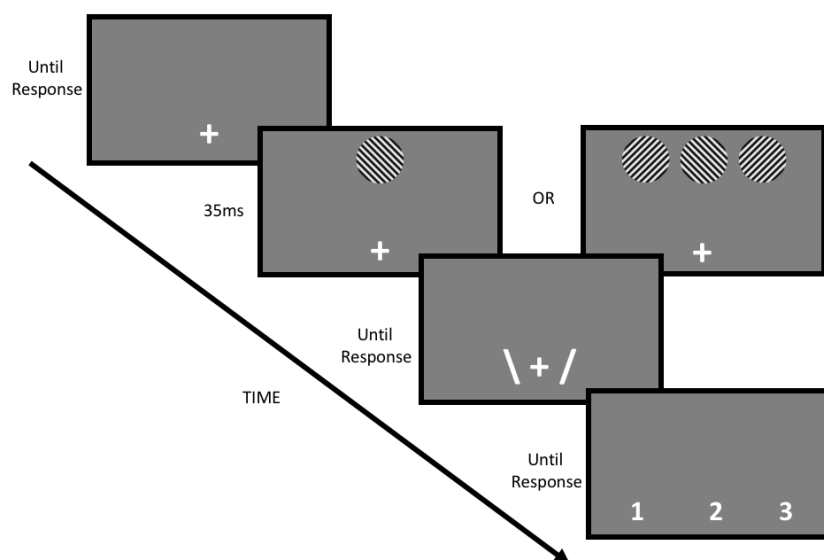

644  
645

Figure 1.

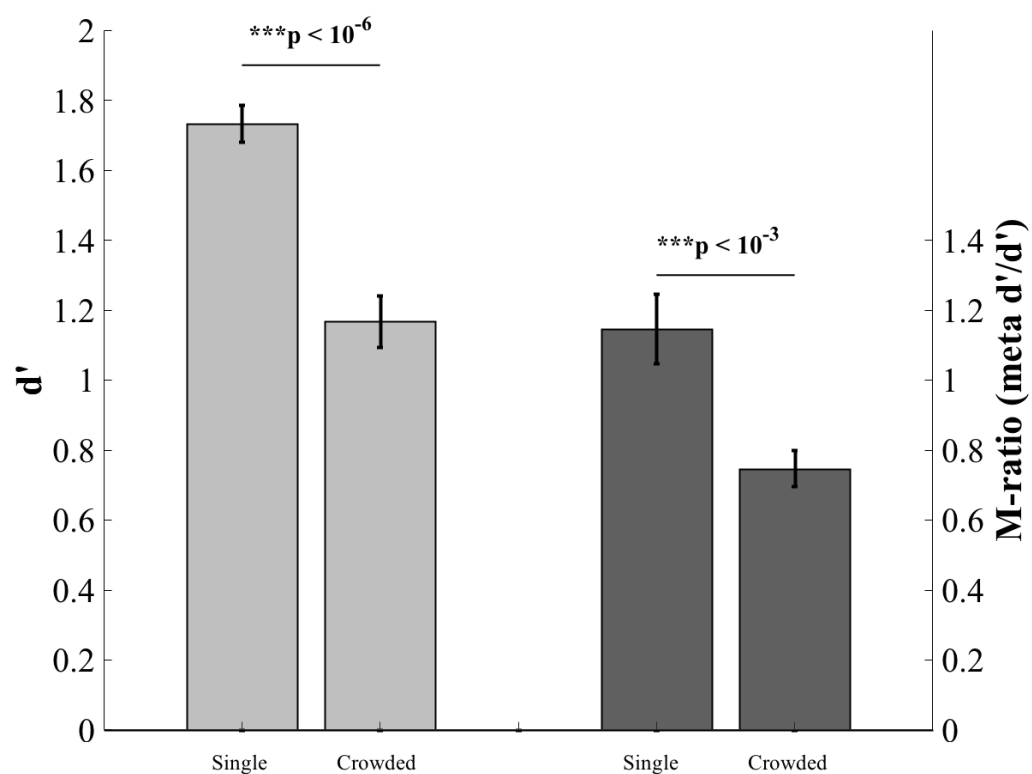

646

647 Figure 2.



648

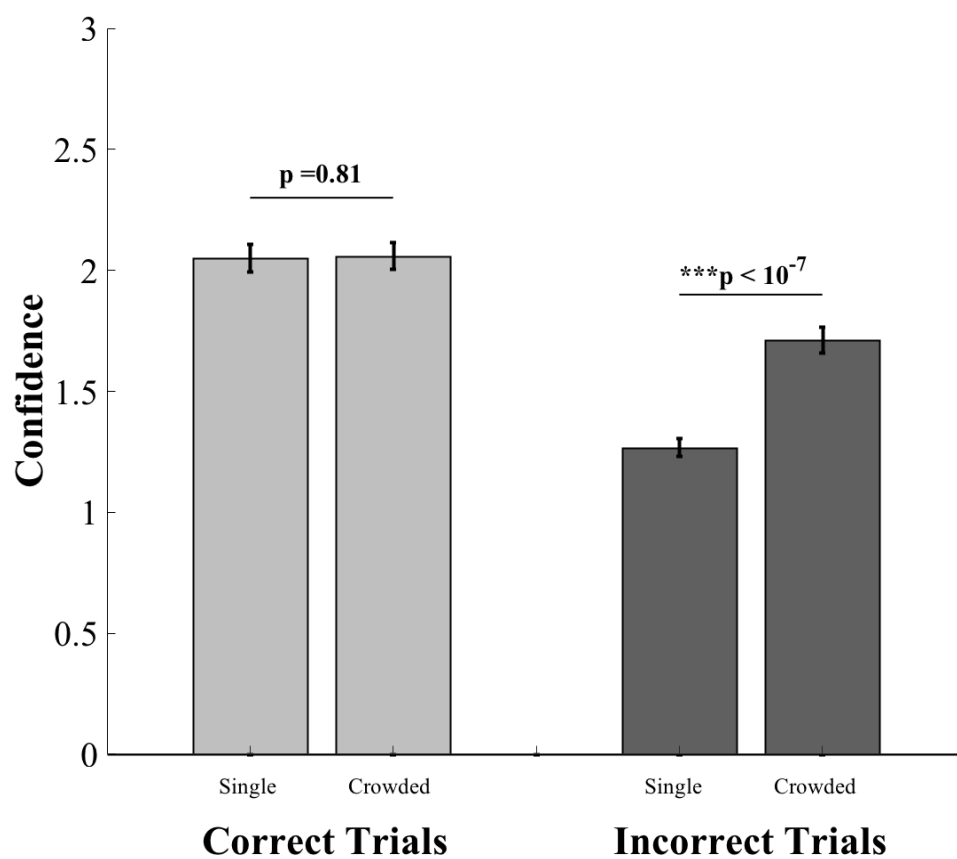

649  
650  
651

Figure 3.

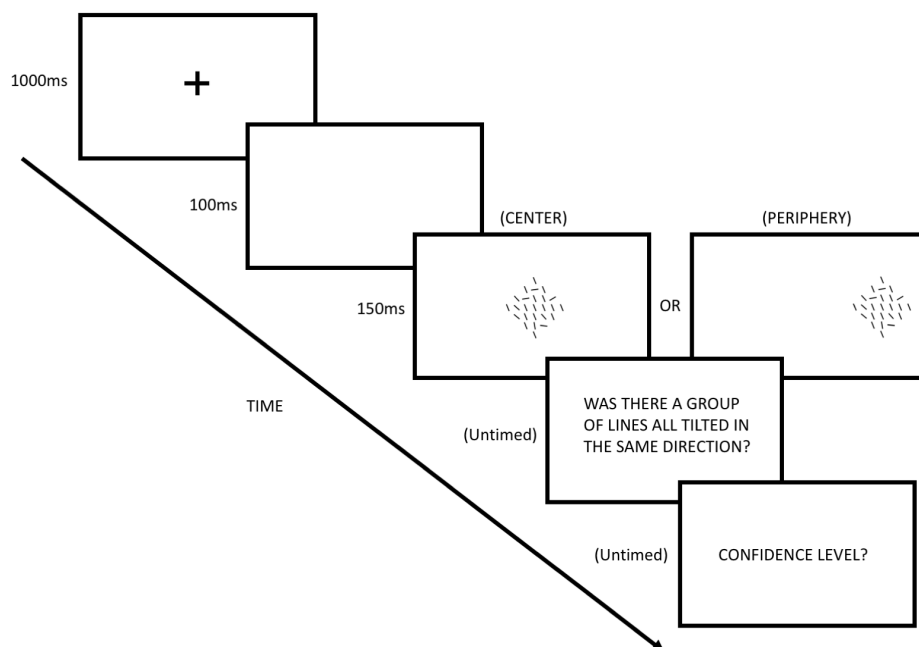

652  
653  
654

Figure 4.

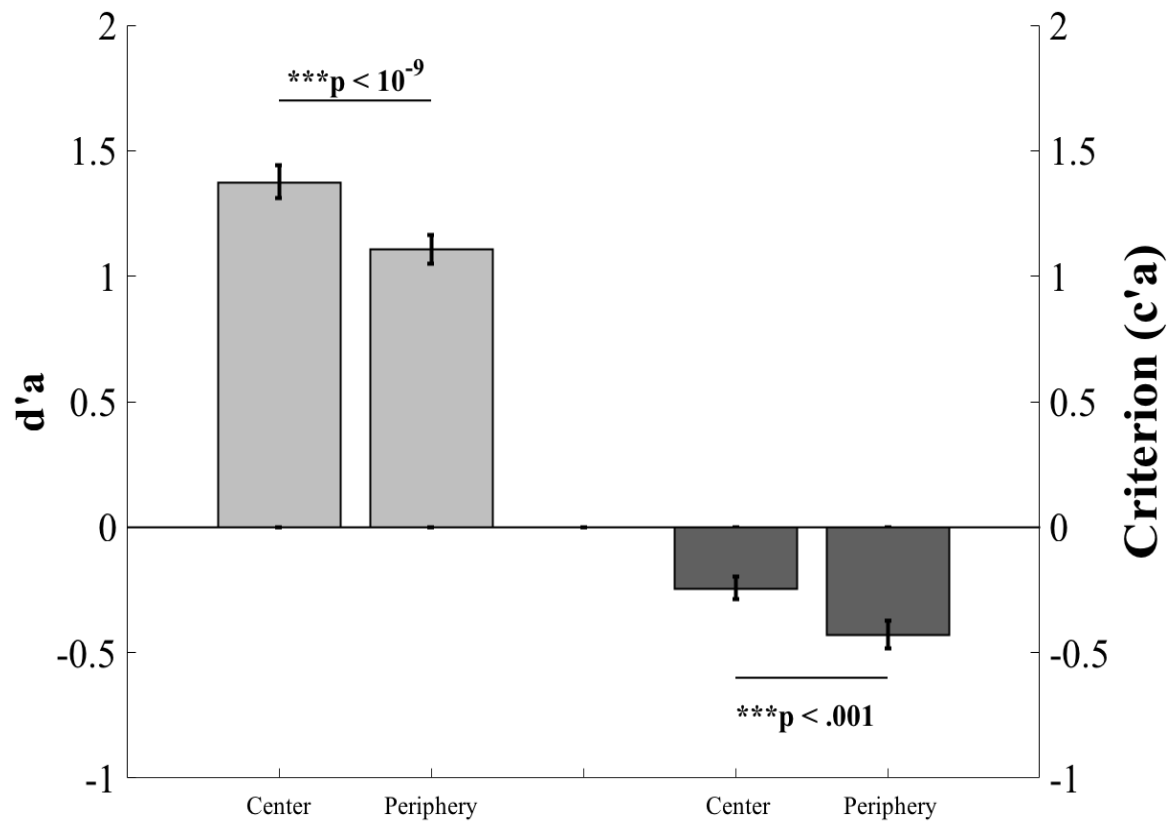

655  
656 **Figure 5.**  
657

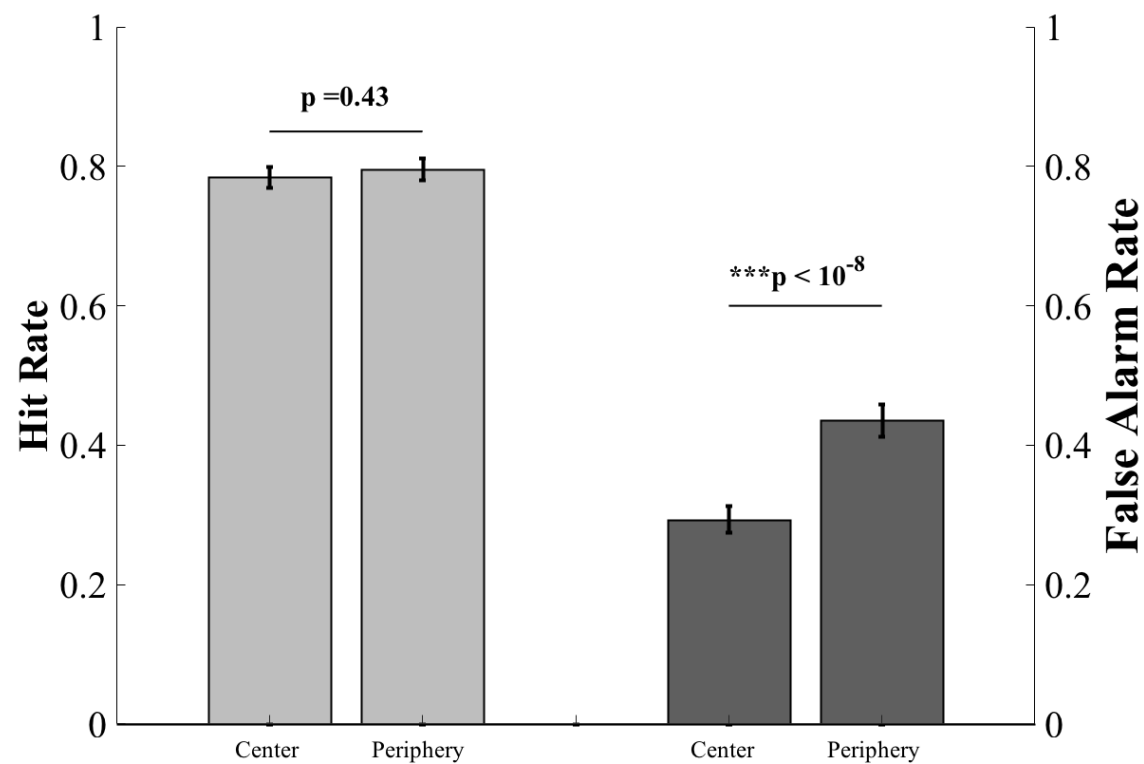

658  
659 **Figure 6.**  
660

661

## 662 References

- 663 1. Sperling G. 1960 The Information Available in Brief Visual Presentations. *Psychological*  
664 *Monographs: General and Applied* **74**, 1–29.
- 665 2. Sligte IG, Vandenbroucke ARE, Scholte HS, Lamme VAF. 2010 Detailed sensory memory, sloppy  
666 working memory. *Front. Psychol.* **1**, 175.
- 667 3. Block N. 2011 Perceptual consciousness overflows cognitive access. *Trends Cogn. Sci.* **15**, 567–575.
- 668 4. Simons DJ, Chabris CF. 1999 Gorillas in our midst: sustained inattention blindness for dynamic  
669 events. *Perception* **28**, 1059–1074.
- 670 5. Rensink RA, O'Regan JK, Clark JJ. 1997 To See or not to See: The Need for Attention to Perceive  
671 Changes in Scenes. *Psychol. Sci.* **8**, 368–373.
- 672 6. Simons DJ, Rensink RA. 2005 Change blindness: past, present, and future. *Trends Cogn. Sci.* **9**, 16–  
673 20.
- 674 7. Whitney D, Levi DM. 2011 Visual crowding: a fundamental limit on conscious perception and  
675 object recognition. *Trends Cogn. Sci.* **15**, 160–168.
- 676 8. Greenwood JA, Bex PJ, Dakin SC. 2010 Crowding changes appearance. *Curr. Biol.* **20**, 496–501.
- 677 9. Sayim B, Wagemans J. 2017 Appearance changes and error characteristics in crowding revealed  
678 by drawings. *J. Vis.* **17**, 8.
- 679 10. Baldassi S, Megna N, Burr DC. 2006 Visual clutter causes high-magnitude errors. *PLoS Biol.* **4**,  
680 e56.
- 681 11. Whitney D, Haberman J, Sweeny TD. 2014 From textures to crowds: multiple levels of summary  
682 statistical perception. *The new visual neurosciences* , 695–710.
- 683 12. Ariely D. 2001 Seeing sets: representation by statistical properties. *Psychol. Sci.* **12**, 157–162.
- 684 13. Williams DW, Sekuler R. 1984 Coherent global motion percepts from stochastic local motions.  
685 *Vision Res.* **24**, 55–62.
- 686 14. Greenwood JA, Bex PJ, Dakin SC. 2009 Positional averaging explains crowding with letter-like  
687 stimuli. *Proc. Natl. Acad. Sci. U. S. A.* **106**, 13130–13135.
- 688 15. Dakin SC. 2001 Information limit on the spatial integration of local orientation signals. *J. Opt. Soc.*  
689 *Am. A Opt. Image Sci. Vis.* **18**, 1016–1026.
- 690 16. Cohen MA, Dennett DC, Kanwisher N. 2016 What is the Bandwidth of Perceptual Experience?  
691 *Trends Cogn. Sci.* **20**, 324–335.
- 692 17. Freeman J, Simoncelli EP. 2011 Metamers of the ventral stream. *Nat. Neurosci.* **14**, 1195–1201.
- 693 18. Komatsu H. 2006 The neural mechanisms of perceptual filling-in. *Nat. Rev. Neurosci.* **7**, 220–231.
- 694 19. Meng M, Remus DA, Tong F. 2005 Filling-in of visual phantoms in the human brain. *Nat.*  
695 *Neurosci.* **8**, 1248–1254.
- 696 20. van Tuijl HF, Leeuwenberg EL. 1979 Neon color spreading and structural information measures.  
697 *Percept. Psychophys.* **25**, 269–284.
- 698 21. De Weerd P, Gattass R, Desimone R, Ungerleider LG. 1995 Responses of cells in monkey visual  
699 cortex during perceptual filling-in of an artificial scotoma. *Nature* **377**, 731–734.
- 700 22. Murakami I. 1995 Motion aftereffect after monocular adaptation to filled-in motion at the blind  
701 spot. *Vision Res.* **35**, 1041–1045.

- 702 23. Perna A, Tosetti M, Montanaro D, Morrone MC. 2005 Neuronal mechanisms for illusory  
703 brightness perception in humans. *Neuron* **47**, 645–651.
- 704 24. Qian CS, Brascamp JW, Liu T. 2017 On the functional order of binocular rivalry and blind spot  
705 filling-in. *Vision Res.* **136**, 15–20.
- 706 25. Bressan P, Mingolla E, Spillmann L, Watanabe T. 1997 Neon color spreading: a review. *Perception*  
707 **26**, 1353–1366.
- 708 26. Friedman HS, Zhou H, von der Heydt R. 1999 Color filling-in under steady fixation: behavioral  
709 demonstration in monkeys and humans. *Perception* **28**, 1383–1395.
- 710 27. Matsumoto M, Komatsu H. 2005 Neural responses in the macaque v1 to bar stimuli with various  
711 lengths presented on the blind spot. *J. Neurophysiol.* **93**, 2374–2387.
- 712 28. Awater H, Kerlin JR, Evans KK, Tong F. 2005 Cortical representation of space around the blind  
713 spot. *J. Neurophysiol.* **94**, 3314–3324.
- 714 29. Fiorani Júnior M, Rosa MG, Gattass R, Rocha-Miranda CE. 1992 Dynamic surrounds of receptive  
715 fields in primate striate cortex: a physiological basis for perceptual completion? *Proc. Natl. Acad.*  
716 *Sci. U. S. A.* **89**, 8547–8551.
- 717 30. Ehinger BV, Häusser K, Ossandón JP, König P. 2017 Humans treat unreliable filled-in percepts as  
718 more real than veridical ones. *Elife* **6**. (doi:10.7554/eLife.21761)
- 719 31. Rahnev D, Maniscalco B, Graves T, Huang E, de Lange FP, Lau H. 2011 Attention induces  
720 conservative subjective biases in visual perception. *Nat. Neurosci.* **14**, 1513–1515.
- 721 32. Solovey G, Graney GG, Lau H. 2015 A decisional account of subjective inflation of visual  
722 perception at the periphery. *Atten. Percept. Psychophys.* **77**, 258–271.
- 723 33. Witt JK, Taylor JET, Sugovic M, Wixted JT. 2015 Signal Detection Measures Cannot Distinguish  
724 Perceptual Biases from Response Biases. *Perception* **44**, 289–300.
- 725 34. Phillips I. 2016 Naïve Realism and the Science of (Some) Illusions. *Philosophical Topics* **44**, 353–380.
- 726 35. Strasburger H, Rentschler I, Jüttner M. 2011 Peripheral vision and pattern recognition: a review. *J.*  
727 *Vis.* **11**, 13.
- 728 36. Azzopardi P, Cowey A. 1993 Preferential representation of the fovea in the primary visual cortex.  
729 *Nature* **361**, 719–721.
- 730 37. Pelli DG, Palomares M, Majaj NJ. 2004 Crowding is unlike ordinary masking: distinguishing  
731 feature integration from detection. *J. Vis.* **4**, 1136–1169.
- 732 38. Brainard DH. 1997 The Psychophysics Toolbox. *Spat. Vis.* **10**, 433–436.
- 733 39. Pelli DG. 1997 The VideoToolbox software for visual psychophysics: transforming numbers into  
734 movies. *Spat. Vis.* **10**, 437–442.
- 735 40. Kleiner, Brainard, Pelli, Ingling, Murray. 2007 What's new in Psychtoolbox-3.
- 736 41. Bouma H. 1970 Interaction effects in parafoveal letter recognition. *Nature* **226**, 177–178.
- 737 42. Levi DM. 2008 Crowding--an essential bottleneck for object recognition: a mini-review. *Vision*  
738 *Res.* **48**, 635–654.
- 739 43. García-Pérez MA. 1998 Forced-choice staircases with fixed step sizes: asymptotic and small-  
740 sample properties. *Vision Res.* **38**, 1861–1881.
- 741 44. Maniscalco B, Lau H. 2012 A signal detection theoretic approach for estimating metacognitive  
742 sensitivity from confidence ratings. *Conscious. Cogn.* **21**, 422–430.
- 743 45. Maniscalco B. 2014 type 2 signal detection theory analysis. See  
744 <http://www.columbia.edu/~bsm2105/type2sdt/> (accessed on 8 January 2018).

- 745 46. Maniscalco B, Lau H. 2014 Signal Detection Theory Analysis of Type 1 and Type 2 Data: Meta-d',  
746 Response-Specific Meta-d', and the Unequal Variance SDT Model. In *The Cognitive Neuroscience of*  
747 *Metacognition*, pp. 25–66. Springer, Berlin, Heidelberg.
- 748 47. Fleming SM, Lau HC. 2014 How to measure metacognition. *Front. Hum. Neurosci.* **8**, 443.
- 749 48. McCurdy LY, Maniscalco B, Metcalfe J, Liu KY, de Lange FP, Lau H. 2013 Anatomical coupling  
750 between distinct metacognitive systems for memory and visual perception. *J. Neurosci.* **33**, 1897–  
751 1906.
- 752 49. de Leeuw JR. 2015 jsPsych: a JavaScript library for creating behavioral experiments in a Web  
753 browser. *Behav. Res. Methods* **47**, 1–12.
- 754 50. Gureckis TM, Martin J, McDonnell J, Rich AS, Markant D, Coenen A, Halpern D, Hamrick JB,  
755 Chan P. 2015 psiTurk: An open-source framework for conducting replicable behavioral  
756 experiments online. *Behav. Res. Methods* (doi:10.3758/s13428-015-0642-8)
- 757 51. Kingdom FAA, Prins N. 2009 *Psychophysics: A Practical Introduction*. 1 edition. Academic Press.
- 758 52. Wetherill GB, Levitt H. 1965 SEQUENTIAL ESTIMATION OF POINTS ON A PSYCHOMETRIC  
759 FUNCTION. *Br. J. Math. Stat. Psychol.* **18**, 1–10.
- 760 53. Macmillan NA, Creelman CD. 2005 *Detection theory: A user's guide, 2nd ed.* Lawrence Erlbaum  
761 Associates Publishers.
- 762 54. Wickens TD. 2002 *Elementary Signal Detection Theory*. Oxford University Press.
- 763 55. Green DM, Swets JA. 1966 Signal detection theory and psychophysics. 1966. *New York*
- 764 56. Haun AM, Tononi G, Koch C, Tsuchiya N. 2017 Are we underestimating the richness of visual  
765 experience? *Neurosci Conscious* **2017**. (doi:10.1093/nc/niw023)
- 766 57. Vandenbroucke ARE, Sligte IG, Barrett AB, Seth AK, Fahrenfort JJ, Lamme VAF. 2014 Accurate  
767 metacognition for visual sensory memory representations. *Psychol. Sci.* **25**, 861–873.
- 768 58. Denison RN, Adler WT, Carrasco M, Ma WJ. 2017 Humans flexibly incorporate attention-  
769 dependent uncertainty into perceptual decisions and confidence. *bioRxiv.* , 175075.  
770 (doi:10.1101/175075)
- 771 59. Morales J, Solovey G, Maniscalco B, Rahnev D, de Lange FP, Lau H. 2015 Low attention impairs  
772 optimal incorporation of prior knowledge in perceptual decisions. *Atten. Percept. Psychophys.* **77**,  
773 2021–2036.
- 774 60. Weiskrantz L. 1997 *Consciousness Lost and Found: A Neuropsychological Exploration*. Oxford  
775 University Press.
- 776 61. Ko Y, Lau H. 2012 A detection theoretic explanation of blindsight suggests a link between  
777 conscious perception and metacognition. *Philos. Trans. R. Soc. Lond. B Biol. Sci.* **367**, 1401–1411.
- 778 62. Knill DC, Richards W. 1996 *Perception as Bayesian Inference*. Cambridge University Press.
- 779 63. Barrett JL, Johnson AH. 2003 The Role of Control in Attributing Intentional Agency to Inanimate  
780 Objects. *J. Cogn. Cult.* **3**, 208–217.

781
